# Supplementary material for: Incipient Social Groups: An Analysis via In-Vivo Behavioral Tracking
Source: PLoS One. 2016 Mar 23;11(3):e0149880. doi: 10.1371/journal.pone.0149880 (PMC4805293; doi:10.1371/journal.pone.0149880)
Supplement: S1 Data — (XLSX) [file pone.0149880.s001.xlsx]

## Sheet: Data
ParticipantID	Session	Age	Gender	Attractiveness	EthnWhite	clusterid.1	clusterid.2	clusterid.3	clusterid.4	clusterid.5	clusterid.6	clusterid.7	clusterid.8	clusterid.9	clusterid.10	clusterid.11	clusterid.12	clusterid.13	clusterid.14	clusterid.15	clusterid.16	SmallGroups_Gender	SmallGroups_Attractiveness	GroupSize_SmallGroups	disttravm.16_meters	speedms.16_meters	nbordistem.1_meters	point2cent.meters.smallgroups
101	1	30	2	6.66667	1	3	1	2	1	6	6	3	3	5	3	2	1	1	1	1	1	1.71623	4.79762	7.88889	63.5889	0.056	14.0285	1.33124
102	1	37	1	2	0	3	1	2	1	6	2	3	6	7	3	3	6	1	1	1	1	1.77963	5.11409	8.22222	56.1067	0.049333	14.0285	1.67378
103	1	21	2	3.66667	0	3	1	2	7	4	5	2	6	7	1	3	3	1	1	1	1	1.86018	5.02531	7.66667	54.4467	0.048	14.1603	1.13513
104	1	21	2	5.33333	0	3	1	2	7	4	5	2	6	7	2	2	3	1	1	1	1	1.86574	4.80692	8.22222	57.9689	0.051111	13.8968	1.15059
105	1	20	2	5.33333	0	3	1	2	7	4	5	5	6	5	2	2	1	1	1	1	1	1.86376	4.99186	8.88889	54.9489	0.048444	13.8529	0.786722
106	1	39	2	4.66667	1	3	1	1	7	4	1	5	3	5	2	1	7	1	1	1	1	1.84259	4.86204	7.77778	60.68	0.053556	13.3699	0.975161
107	1	20	2	5	1	5	1	2	7	4	5	5	3	7	2	2	3	1	1	1	1	1.89907	5.11684	8.11111	61.2844	0.054	11.5478	0.876324
108	1	21	2	5	1	5	1	2	7	5	7	5	3	5	2	1	1	1	1	1	1	1.90899	5.28618	7.66667	61.9978	0.054667	10.9769	0.960967
109	1	20	2	3.33333	1	5	1	2	7	6	7	5	6	6	2	2	1	1	1	1	1	1.86825	5.20357	8.11111	65.2644	0.057556	10.3183	0.929901
110	1	22	2	6.66667	1	5	1	2	7	4	3	4	3	7	2	1	6	1	1	1	1	1.90154	5.00317	8.33333	61.3667	0.054	9.76948	1.11215
111	1	20	2	6	1	5	1	2	7	6	3	5	3	7	2	1	6	1	1	1	1	1.92932	5.0838	8.11111	66.3911	0.058444	9.52799	1.10883
112	1	20	2	4.33333	1	5	1	1	2	6	7	4	1	1	1	5	7	1	1	1	1	1.79074	4.70803	6.66667	61.0133	0.053778	9.13282	1.12427
113	1	21	2	5	1	5	1	2	2	5	3	4	1	3	4	1	1	1	1	1	1	1.72628	5.01934	7.55556	55.1111	0.048667	8.86937	1.18107
114	1	22	2	4.66667	1	5	1	2	2	5	4	4	6	7	4	5	8	1	1	1	1	1.73968	4.86265	7.66667	70.3333	0.062	8.78156	1.28591
115	1	24	1	5	1	5	1	2	2	4	3	4	1	4	4	6	3	1	1	1	1	1.75926	4.89743	7.44444	50.6467	0.044667	8.56202	1.32954
116	1	21	2	3.66667	1	5	1	2	2	4	5	4	2	1	6	5	7	1	1	1	1	1.86451	4.88364	7.11111	58.6133	0.051556	8.23271	1.42167
117	1	41	2	2.66667	1	3	1	1	2	1	1	6	2	6	9	7	8	1	1	1	1	1.63845	4.85705	6	69.4733	0.061111	12.843	1.30954
118	1	21	2	5.33333	1	1	1	2	4	2	2	6	1	2	6	1	7	1	1	1	1	1.65586	4.79197	6	58.8556	0.051778	7.83754	1.17561
119	1	31	1	3.33333	0	1	1	2	4	5	6	6	1	3	5	5	5	1	1	1	1	1.85141	5.46429	7	60.4333	0.053333	7.66191	1.00901
120	1	18	2	7	1	1	1	2	4	5	3	8	2	6	5	5	4	1	1	1	1	1.82033	5.43614	8.33333	55.94	0.049333	7.59605	1.06225
121	1	21	2	6.33333	1	1	1	2	4	5	4	8	2	6	5	5	2	1	1	1	1	1.81971	5.31355	8.44444	54.8533	0.048444	7.46432	0.91636
122	1	20	2	6.66667	1	1	1	2	4	5	3	8	4	3	5	5	2	1	1	1	1	1.79947	5.4764	8.22222	54.6867	0.048222	7.39846	1.00293
123	1	19	2	6.33333	1	1	1	2	4	5	3	8	4	4	5	5	4	1	1	1	1	1.75966	5.67797	7.66667	53.5511	0.047111	7.35456	0.796836
124	1	19	2	5	0	1	1	2	4	2	6	8	4	3	5	7	5	1	1	1	1	1.6601	5.41342	6.33333	59.9311	0.052889	7.3326	0.796799
125	1	19	2	7	1	1	1	1	4	3	7	8	1	2	5	4	2	1	1	1	1	1.76618	5.25072	6.88889	60.9689	0.053778	7.3326	1.1576
126	1	23	1	5.66667	1	1	1	2	4	2	2	8	1	5	9	4	4	1	1	1	1	1.78677	5.44249	7.22222	57.6378	0.050889	7.42042	1.2176
127	1	23	2	5.66667	1	1	1	2	4	2	6	8	2	3	9	4	8	1	1	1	1	1.72818	5.21348	7.33333	58.5578	0.051556	7.42042	0.920264
128	1	20	2	7	0	4	1	1	6	2	4	9	4	3	9	7	4	1	1	1	1	1.75093	5.19753	5.88889	61.6933	0.054444	7.57409	0.758584
129	1	21	2	6.33333	1	4	1	1	6	3	4	9	2	4	9	7	8	1	1	1	1	1.76358	5.05072	6.22222	60.7444	0.053556	7.66191	0.80202
130	1	19	2	5.33333	0	4	1	1	6	3	4	9	2	6	8	4	2	1	1	1	1	1.79268	5.1356	6.77778	67.4689	0.059556	7.77168	1.01447
131	1	19	2	4.66667	0	4	1	1	6	3	4	1	2	6	8	4	2	1	1	1	1	1.71861	4.88289	6.88889	64.4667	0.056889	7.85949	1.16959
132	1	34	1	3.33333	0	4	1	1	6	1	4	1	4	4	8	4	2	1	1	1	1	1.76548	5.00653	6.44444	60.5644	0.053333	8.10099	1.00372
133	1	30	1	2.33333	0	4	1	1	6	1	2	1	2	3	8	4	8	1	1	1	1	1.68862	4.77188	7	55.2044	0.048667	8.51811	1.09151
134	1	21	2	4.66667	0	4	1	1	6	1	4	1	2	4	8	4	8	1	1	1	1	1.56411	4.50635	7	54.1289	0.047778	8.40834	0.918958
135	1	19	1	5.33333	1	4	1	1	3	1	2	6	1	4	5	7	8	1	1	1	1	1.61746	4.55767	6	61.8378	0.054444	8.93524	0.926519
136	1	20	2	5	1	4	1	1	3	6	3	7	5	5	8	5	6	1	1	1	1	1.65339	4.96183	7	62.34	0.054889	8.93524	1.11035
137	1	23	1	3.66667	0	4	1	1	3	1	4	7	1	3	4	6	7	1	1	1	1	1.65833	4.81142	6.22222	69.14	0.060889	9.26454	1.19505
138	1	20	2	5.33333	1	4	1	1	5	6	7	7	4	3	1	1	1	1	1	1	1	1.82024	4.97743	6.33333	56.2511	0.049556	9.33041	0.783859
139	1	21	2	5.33333	0	2	1	1	5	6	5	3	5	6	1	6	6	1	1	1	1	1.77857	4.79158	6.88889	61.4289	0.054222	9.90121	1.33772
140	1	21	2	4.66667	1	2	1	1	1	4	3	3	5	2	3	1	7	1	1	1	1	1.74568	5.07725	8	62.8378	0.055333	10.1866	1.36917
141	1	32	1	2.66667	1	2	1	1	1	4	1	3	5	6	3	6	7	1	1	1	1	1.79815	4.84162	7.55556	61.4378	0.054222	10.7574	1.12145
142	1	20	2	5	0	2	1	1	1	6	5	3	6	7	7	3	1	1	1	1	1	1.73752	4.81872	8.77778	59.5911	0.052444	10.7574	1.2227
143	1	22	1	4.33333	1	2	1	1	1	6	2	3	6	5	7	6	1	1	1	1	1	1.68827	4.92375	8.66667	54.9711	0.048444	11.1526	1.45045
144	1	23	2	5.33333	1	2	1	1	1	4	5	3	6	7	7	3	3	1	1	1	1	1.7108	4.80473	8.88889	68.5	0.060444	11.9429	1.60058
145	1	20	2	5.66667	1	2	1	1	1	6	5	3	6	5	7	3	3	1	1	1	1	1.69321	4.81605	8.77778	64.0378	0.056444	12.6894	1.26757
146	1	19	1	6	1	2	1	1	1	4	7	3	6	5	7	2	3	1	1	1	1	1.8179	4.94362	8.77778	58.2956	0.051333	13.3041	1.70525
147	1	21	2	6.33333	0	2	1	1	1	4	3	3	5	5	3	6	6	1	1	1	1	1.63457	4.78951	8.44444	55.9356	0.049333	13.6114	0.912307
201	2	22	2	5	0	1	1	6	2	7	4	2	1	6	3	1	1	1	1	1	1	1.77037	5.53867	7.22222	40.3089	0.034667	9.22064	1.1011
202	2	18	2	6.33333	1	1	1	6	2	4	1	2	3	2	1	3	4	1	1	1	1	1.69007	5.51793	6.33333	35.4733	0.030444	8.29857	0.784284
203	2	19	2	6.66667	1	1	1	6	2	5	2	1	1	6	1	3	1	1	1	1	1	1.86667	5.46592	6.44444	36.1	0.031111	7.94731	0.758048
204	2	19	2	5.66667	1	1	1	6	1	5	2	6	3	1	1	4	4	1	1	1	1	1.8271	5.45645	6.55556	34.8444	0.03	7.35456	0.784299
205	2	19	2	6.66667	0	1	1	6	1	7	4	6	1	2	1	4	1	1	1	1	1	1.78704	5.39969	7.11111	46.0867	0.039556	6.89352	1.08499
206	2	20	1	4.66667	1	1	1	4	1	6	2	6	5	1	4	5	2	1	1	1	1	1.82407	5.23945	7.88889	30.5133	0.026222	6.32272	1.22745
207	2	20	2	4	0	1	1	4	1	5	3	6	5	1	1	4	4	1	1	1	1	1.74351	5.69494	6.88889	31.88	0.027333	5.86169	0.994254
208	2	25	2	4.66667	0	1	1	4	1	6	3	6	3	4	1	3	4	1	1	1	1	1.78795	5.72577	6.88889	38.1533	0.032667	5.48847	1.08711
209	2	19	2	6	1	1	1	3	1	5	4	1	4	3	1	4	4	1	1	1	1	1.89192	5.84943	6.66667	35.1444	0.030222	5.18112	0.87132
210	2	19	2	6.66667	1	1	1	5	3	6	2	4	7	4	1	4	4	1	1	1	1	1.86044	5.60248	7.44444	25.0822	0.021556	4.96158	0.885215
211	2	21	2	5	1	1	1	3	3	6	2	1	7	3	1	6	2	1	1	1	1	1.85286	5.83952	7	33.6467	0.028889	4.93963	0.892167
212	2	18	1	5.33333	1	1	1	3	3	4	1	2	1	2	4	5	1	1	1	1	1	1.825	5.55	7.88889	35.7556	0.030667	4.93963	1.28086
213	2	20	2	6.33333	1	2	1	5	3	7	5	4	3	4	4	4	4	1	1	1	1	1.8771	5.69663	7.44444	35.2689	0.030222	5.0494	1.31451
214	2	17	2	7.66667	1	2	1	5	3	5	7	4	7	3	4	1	4	1	1	1	1	1.81784	5.57602	7.55556	33.8933	0.029111	5.18112	1.01016
215	2	20	2	7	0	2	1	5	5	3	4	4	4	4	2	6	2	1	1	1	1	1.88434	6.04613	6.55556	36.6333	0.031556	5.22503	0.732582
216	2	20	2	7.66667	1	2	1	5	5	3	3	5	7	3	2	5	2	1	1	1	1	1.87482	5.81267	8.11111	33.2178	0.028444	5.51043	0.848772
217	2	23	2	7	1	2	1	2	5	4	3	5	2	6	2	2	3	1	1	1	1	1.74788	6.10626	6.44444	35.8111	0.030667	5.68606	0.789448
218	2	19	1	6.33333	0	2	1	5	5	6	7	5	6	2	5	2	3	1	1	1	1	1.78796	6.12407	6.44444	34.5711	0.029778	6.05928	0.888816
219	2	21	2	7.66667	0	2	1	2	5	1	5	5	2	4	5	2	1	1	1	1	1	1.85463	5.92654	7.88889	37.2622	0.032	6.32272	1.17957
220	2	20	2	3.66667	0	2	1	2	5	1	1	5	2	3	5	5	2	1	1	1	1	1.82786	6.06102	8.55556	36.9844	0.031778	6.56421	0.885385
221	2	26	2	5.66667	0	2	1	2	5	3	5	5	7	4	5	5	2	1	1	1	1	1.86953	6.14302	8.22222	34.5178	0.029556	7.0472	0.894386
222	2	23	1	7.66667	0	2	1	1	5	2	7	5	4	2	5	6	3	1	1	1	1	1.83796	5.95	6.11111	39.5711	0.034	7.39846	0.64138
223	2	20	2	6.33333	0	2	1	1	5	1	6	5	2	6	5	2	2	1	1	1	1	1.86675	6.10956	7.66667	36.9111	0.031778	7.92536	0.543275
224	2	20	2	6.33333	1	2	1	1	5	1	5	3	4	3	5	5	1	1	1	1	1	1.81204	5.91049	7.55556	38.8711	0.033333	8.34248	0.947827
225	2	20	2	5.66667	1	2	1	1	5	1	4	5	7	6	4	5	2	1	1	1	1	1.84638	5.75783	9.22222	39.1867	0.033556	8.93524	1.80434
226	2	21	2	6.66667	1	2	1	1	6	2	6	3	2	3	4	2	2	1	1	1	1	1.87403	5.73644	7.22222	36.2867	0.031111	9.44018	1.68623
227	2	22	2	6.33333	0	2	1	1	6	1	4	3	6	7	4	5	1	1	1	1	1	1.6795	5.33395	8.11111	37.3133	0.032	10.1207	1.35544
228	2	22	1	3.66667	0	2	1	1	6	1	4	3	6	7	4	5	1	1	1	1	1	1.86481	5.82813	8.11111	31.9244	0.027333	10.1866	1.49537
229	2	20	2	6	0	1	1	6	6	1	3	3	7	2	4	2	1	1	1	1	1	1.77738	5.81839	8.33333	30.6844	0.026444	8.12294	1.49115
230	2	21	2	6.33333	0	1	1	4	6	2	5	3	6	6	4	1	1	1	1	1	1	1.80635	5.53263	7.55556	34.0867	0.029333	7.46432	1.37057
231	2	19	2	4	1	1	1	7	6	2	1	4	7	4	4	1	4	1	1	1	1	1.84827	5.82329	7.88889	33.2844	0.028667	6.71789	1.07756
232	2	19	2	4.33333	1	1	1	7	6	2	1	4	6	6	4	1	1	1	1	1	1	1.80079	5.67266	7.55556	28.0667	0.024	6.36663	1.05016
233	2	19	2	4	0	1	1	7	6	1	5	2	1	6	4	6	2	1	1	1	1	1.83051	5.63961	8.55556	37.6222	0.032222	5.9056	1.40499
234	2	26	2	3	0	1	1	7	4	7	2	2	1	3	3	5	2	1	1	1	1	1.6862	5.46074	8.22222	38.62	0.033111	5.59824	1.10442
235	2	19	2	3.66667	1	1	1	3	4	6	3	4	1	1	3	5	3	1	1	1	1	1.62011	5.47231	6.77778	34.5689	0.029778	5.40066	0.775258
236	2	18	2	4.66667	1	1	1	3	4	7	7	2	5	5	3	6	2	1	1	1	1	1.47323	5.52896	6.44444	33.0111	0.028444	5.29089	0.944072
237	2	20	1	5	1	1	1	5	4	4	3	2	5	1	3	3	4	1	1	1	1	1.68152	5.2739	6.88889	36.2511	0.031111	5.20307	1.15857
238	2	19	1	6	1	1	1	2	4	7	2	2	5	5	3	3	4	1	1	1	1	1.72517	5.04012	6.77778	35.5111	0.030444	5.3348	1.33339
239	2	19	1	6	1	1	1	2	4	7	3	2	5	7	3	1	4	1	1	1	1	1.70004	5.07169	7.11111	37.5311	0.032222	5.37871	1.11979
301	3	19	2	4.33333	1	3	1	2	1	5	4	2	3	1	6	4	2	1	1	1	1	1.79983	5.4883	8.22222	52.9822	0.127333	14.4457	0.862634
302	3	22	1	4.66667	0	3	1	2	1	3	5	5	5	2	2	6	1	1	1	1	1	1.75688	5.57072	6.55556	59.3644	0.142889	13.7651	1.26787
303	3	19	2	6.33333	1	3	1	2	1	6	2	7	4	1	2	6	1	1	1	1	1	1.74401	5.4479	9.77778	35.7178	0.086	12.9528	1.41147
304	3	19	2	5.66667	1	3	1	2	1	2	6	5	4	3	2	1	4	1	1	1	1	1.71905	5.55106	7.33333	37.6756	0.090667	12.382	0.908392
305	3	21	2	7.33333	0	3	1	2	1	6	2	7	5	2	1	4	5	1	1	1	1	1.78204	5.45828	8.22222	50.4867	0.121333	11.6136	1.1349
306	3	19	2	7	0	3	1	2	1	3	2	7	3	1	1	4	3	1	1	1	1	1.90936	5.69763	9.66667	48.9756	0.117778	11.0648	0.934189
307	3	32	2	7.66667	1	3	1	2	1	3	2	7	4	4	7	4	5	1	1	1	1	1.90055	5.48131	9.11111	56.7333	0.136444	10.6915	0.575971
308	3	20	3	6.66667	1	3	1	2	1	3	2	7	4	1	1	4	5	1	1	1	1	1.73426	5.83035	10.2222	50.9978	0.122667	10.1207	1.09604
309	3	38	1	3.66667	0	3	1	2	1	5	6	7	5	1	2	6	2	1	1	1	1	1.78862	5.51283	8.55556	48.5356	0.116667	9.5719	1.29802
310	3	19	1	5	1	3	1	2	1	2	5	4	2	1	1	6	1	1	1	1	1	1.57976	5.34992	8.44444	52.0644	0.125333	9.13282	0.879035
311	3	19	1	4.33333	1	3	1	2	1	2	5	4	2	1	1	6	1	1	1	1	1	1.57976	5.51326	8.44444	50.3733	0.121111	8.73765	1.29867
312	3	18	2	5.33333	1	3	1	2	1	6	6	1	3	1	8	2	3	1	1	1	1	1.84719	5.20216	10.4444	52.9222	0.127333	8.38639	1.34563
313	3	17	2	4.33333	1	3	1	2	1	6	6	1	3	1	8	2	3	1	1	1	1	1.84719	5.36409	10.4444	47.4067	0.114	8.16685	1.35287
314	3	19	2	5	0	1	1	2	6	6	5	1	4	2	8	5	3	1	1	1	1	1.79709	5.30419	8.77778	58.1533	0.139778	7.88145	1.34834
315	3	20	2	4.66667	1	1	1	2	6	6	2	6	1	4	8	2	2	1	1	1	1	1.80108	5.35443	9.77778	57.6067	0.138667	7.68386	1.35686
316	3	18	2	4.66667	1	1	1	2	6	6	6	6	2	1	8	2	2	1	1	1	1	1.68978	5.27352	10	54.6711	0.131556	7.46432	1.27899
317	3	18	1	6.66667	1	1	1	1	6	7	6	6	2	1	8	5	3	1	1	1	1	1.79087	5.20838	10	50.24	0.120889	7.28869	1.37937
318	3	21	2	5.66667	1	1	1	2	6	6	4	6	1	4	8	2	2	1	1	1	1	1.72965	5.00858	9.22222	44.9756	0.108222	7.09111	1.28705
319	3	24	2	5	0	1	1	2	6	7	6	6	1	4	8	2	3	1	1	1	1	1.71775	5.3152	10	55.0489	0.132444	6.98134	1.30127
320	3	20	2	6	1	1	1	1	6	7	2	6	4	1	8	2	3	1	1	1	1	1.78899	5.44231	10.5556	51.9822	0.125111	6.89352	1.45858
321	3	19	1	6.66667	1	1	1	2	5	1	3	6	2	1	8	1	5	1	1	1	1	1.51832	5.07772	10.1111	51.1244	0.122889	6.80571	1.13082
322	3	19	1	3.33333	1	1	1	2	5	1	3	6	2	1	8	1	5	1	1	1	1	1.51832	5.59164	10.1111	53.8311	0.129556	6.78375	1.17993
323	3	19	1	6	1	1	1	2	5	1	3	6	2	1	8	1	5	1	1	1	1	1.51832	5.18051	10.1111	50.1578	0.120667	6.7618	1.2362
324	3	18	2	4.66667	0	1	1	1	3	4	3	3	1	3	4	5	3	1	1	1	1	1.73454	5.36179	9.33333	46.2511	0.111333	6.78375	1.26673
325	3	20	2	7	1	1	1	1	3	4	3	3	1	3	4	5	4	1	1	1	1	1.75042	5.09757	8	49.1356	0.118222	6.82766	1.13931
326	3	20	2	5.33333	1	1	1	1	3	4	3	3	1	3	4	5	4	1	1	1	1	1.75042	5.40157	8	48.1044	0.115778	6.89352	1.02527
327	3	21	1	4.66667	0	1	1	1	3	4	3	3	1	4	4	3	5	1	1	1	1	1.74241	5.16509	9.77778	58.88	0.141556	6.93743	0.954702
328	3	21	2	5	1	2	1	1	3	4	1	3	1	4	4	5	3	1	1	1	1	1.73917	5.11656	10.1111	55.4956	0.133556	7.11306	1.26857
329	3	21	2	4.66667	1	2	1	1	3	4	3	3	1	4	4	3	5	1	1	1	1	1.61843	5.16509	9.77778	56.8489	0.136667	7.26674	1.30477
330	3	21	2	5.33333	1	2	1	2	3	4	1	3	1	4	4	1	3	1	1	1	1	1.71378	5.06008	10.3333	51.9267	0.124889	7.42042	1.71017
331	3	21	1	4.66667	0	2	1	2	3	4	3	3	1	4	4	3	5	1	1	1	1	1.74241	5.16509	9.77778	58.5956	0.140889	7.618	1.29936
332	3	19	2	4.66667	1	2	1	1	4	1	1	3	1	4	3	4	2	1	1	1	1	1.68983	4.78135	9.22222	50.6267	0.121778	7.74973	1.43369
333	3	19	1	3.66667	1	2	1	1	4	1	1	3	1	4	8	4	2	1	1	1	1	1.79821	5.00701	10.2222	52.7267	0.126889	8.01317	1.67483
334	3	19	2	4.66667	1	2	1	1	4	1	1	8	4	1	3	4	3	1	1	1	1	1.74256	4.89952	10.1111	41.7333	0.100444	8.29857	1.21833
335	3	25	1	3	0	2	1	1	4	1	1	8	4	4	3	3	3	1	1	1	1	1.83743	5.00988	8.88889	48.3222	0.116222	8.64983	1.04781
336	3	20	2	5	1	2	1	1	4	1	1	8	4	4	3	3	3	1	1	1	1	1.67394	4.68289	8.88889	55.9067	0.134444	9.19868	1.28576
337	3	21	2	4.33333	0	2	1	1	4	1	1	8	4	1	7	4	3	1	1	1	1	1.7796	5.31996	9.88889	46.8733	0.112667	9.61581	1.17874
338	3	19	2	6	1	2	1	1	2	5	5	8	1	3	6	4	2	1	1	1	1	1.81563	5.13568	7.44444	47.0244	0.113111	10.1866	0.869681
339	3	22	2	6.66667	0	2	1	1	2	2	2	5	2	3	6	1	1	1	1	1	1	1.69788	5.53792	6.55556	52.0844	0.125333	10.0549	1.34457
340	3	22	1	5	1	2	1	1	2	2	4	2	5	2	5	6	5	1	1	1	1	1.77388	5.32321	6.55556	50.1	0.120444	10.5379	1.21886
341	3	21	2	4	1	2	1	1	2	6	5	2	5	2	5	1	1	1	1	1	1	1.64762	5.50706	6.77778	55.4733	0.133333	10.6257	0.837247
342	3	20	2	6.33333	1	2	1	1	2	2	5	2	4	2	5	1	1	1	1	1	1	1.66429	5.19965	7.33333	55.1644	0.132667	10.5818	0.879444
343	3	19	2	6.33333	1	2	1	1	2	5	6	2	4	1	5	6	5	1	1	1	1	1.71361	5.13502	9.11111	49.0489	0.118	10.933	0.971134
344	3	19	2	4.66667	1	2	1	1	2	5	6	2	4	1	5	6	5	1	1	1	1	1.71361	5.38272	9.11111	51.6378	0.124222	10.9989	1.15334
345	3	31	2	6.33333	0	2	1	1	2	3	1	5	3	1	6	3	3	1	1	1	1	1.80168	5.321	8.44444	56.7	0.136444	11.3721	1.11961
401	4	39	2	3.66667	1	4	1	6	1	5	6	2	3	6	1	2	2	1	1	1	1	1.69782	5.30203	8	52.6311	0.088222	12.7552	0.920763
402	4	18	1	6	1	4	1	4	1	2	4	2	3	2	1	3	2	1	1	1	1	1.70728	5.27933	9.44444	44.1644	0.074	12.1844	1.19703
403	4	19	2	5	1	4	1	2	2	2	6	3	3	1	1	2	2	1	1	1	1	1.80232	5.08291	8	51.52	0.086444	11.5258	1.31385
404	4	18	2	5	0	4	1	2	2	5	6	3	3	6	2	2	2	1	1	1	1	1.82216	4.86157	7.22222	49.6911	0.083333	10.955	0.665511
405	4	21	2	4.66667	1	4	1	2	2	2	4	3	3	2	2	1	1	1	1	1	1	1.75611	5.27002	7.55556	50.1533	0.084	10.6476	0.906243
406	4	20	2	3.66667	1	4	1	2	2	2	3	3	3	1	2	2	3	1	1	1	1	1.89186	5.30912	7.66667	49.1067	0.082222	10.1866	0.746372
407	4	20	1	5	0	4	1	2	7	5	6	3	3	7	1	3	2	1	1	1	1	1.80173	4.99735	8.66667	47.2867	0.079333	9.74753	1.1848
408	4	19	2	6	1	4	1	5	7	5	4	3	3	6	2	5	3	1	1	1	1	1.73908	5.0298	7.88889	44.5733	0.074667	9.26454	0.863228
409	4	20	2	6.66667	0	4	1	6	7	2	2	3	2	8	2	1	3	1	1	1	1	1.82049	5.02353	6.88889	54.4444	0.091333	8.84742	0.913446
410	4	24	2	5.33333	1	4	1	2	7	1	3	3	3	2	4	5	1	1	1	1	1	1.83667	5.01932	8.33333	54.8311	0.092	8.54007	1.02818
411	4	20	2	6	1	4	1	5	7	3	5	1	1	2	4	1	5	1	1	1	1	1.73598	4.9571	6.77778	51.0533	0.085556	8.25466	0.825704
412	4	21	2	5.33333	1	1	1	5	7	2	3	1	3	1	4	4	5	1	1	1	1	1.78248	4.75484	6.88889	55.6022	0.093111	7.88145	0.888908
413	4	29	1	4.33333	0	1	1	5	3	6	5	5	2	8	5	1	5	1	1	1	1	1.95318	4.71847	7.33333	42.2311	0.070667	7.63996	1.13217
414	4	19	2	3.33333	1	1	1	5	3	3	5	5	2	7	5	4	5	1	1	1	1	1.76839	4.78783	7.55556	58.5489	0.098222	7.37651	1.09508
415	4	17	2	5.33333	1	1	1	6	3	4	5	5	2	1	5	1	4	1	1	1	1	1.85542	4.99603	7.55556	46.4689	0.077778	7.15697	0.978373
416	4	21	2	4.66667	1	1	1	6	3	4	2	5	4	3	5	4	1	1	1	1	1	1.81294	4.62122	8.22222	38.62	0.064667	7.00329	1.10549
417	4	34	2	3.66667	0	1	1	6	3	1	5	5	4	7	4	3	2	1	1	1	1	1.73776	4.8821	10	54.1	0.090667	6.82766	1.1266
418	4	20	2	6.33333	1	1	1	4	5	1	5	5	4	3	5	5	1	1	1	1	1	1.8517	4.54046	9.44444	49.2689	0.082667	6.69594	0.938452
419	4	20	2	5	1	1	1	4	5	1	5	5	4	3	5	5	1	1	1	1	1	1.8517	4.75562	9.44444	44.7711	0.075111	6.63008	0.981704
420	4	20	2	3	1	1	1	4	5	6	3	5	4	5	5	5	1	1	1	1	1	1.85646	5.00975	7.66667	52.5067	0.088	6.60812	0.905048
421	4	20	2	4.33333	1	2	1	4	4	4	5	5	4	8	5	2	3	1	1	1	1	1.83652	5.09586	9.33333	52.9911	0.088889	6.58617	1.17332
422	4	18	2	4.66667	1	2	1	4	4	6	1	4	2	6	4	3	1	1	1	1	1	1.74478	4.79143	8.11111	50.7356	0.085111	6.58617	1.04473
423	4	20	2	8	1	2	1	4	4	1	5	4	4	5	4	5	4	1	1	1	1	1.88263	4.75585	9	50.7933	0.085111	6.65203	1.19455
424	4	24	2	5	1	2	1	4	4	6	2	4	2	1	5	3	2	1	1	1	1	1.77379	4.84962	8.77778	53.7489	0.09	6.71789	1.55378
425	4	18	2	5	1	2	1	4	6	3	1	4	2	4	5	5	3	1	1	1	1	1.70032	5.07621	8.55556	49.3889	0.082667	6.82766	1.31643
426	4	36	2	4.66667	0	2	1	4	4	1	5	4	4	3	3	5	1	1	1	1	1	1.82187	5.03157	9.88889	51.7111	0.086667	6.95939	1.27929
427	4	20	1	7	0	2	1	1	6	4	5	4	4	4	3	3	3	1	1	1	1	1.81496	5.05848	10.3333	48.4089	0.081111	7.13502	1.49072
428	4	18	2	5.66667	1	2	1	1	6	4	5	4	4	4	3	3	2	1	1	1	1	1.68108	5.09557	10.2222	47.6956	0.08	7.22283	1.06807
429	4	21	2	3.66667	0	2	1	6	6	4	5	4	4	5	3	4	5	1	1	1	1	1.78237	5.10012	9.11111	46.5667	0.078	7.46432	1.63358
430	4	21	2	4	1	2	1	3	6	1	2	4	1	2	3	4	1	1	1	1	1	1.79857	5.10955	8.22222	48.2578	0.080889	7.79363	1.37701
431	4	22	2	5.66667	0	2	1	3	6	4	5	4	1	4	3	3	3	1	1	1	1	1.69864	5.22952	10	38.7511	0.064889	8.12294	1.64105
432	4	19	2	3.66667	1	3	1	3	6	1	2	4	4	8	3	3	2	1	1	1	1	1.73399	5.18547	9.77778	49.2156	0.082444	8.38639	1.22615
433	4	18	1	6.66667	1	3	1	3	6	3	4	4	4	4	3	3	3	1	1	1	1	1.75623	5.08948	9.66667	53.46	0.089556	8.7157	1.42859
434	4	22	1	2.66667	1	3	1	6	6	6	1	1	3	7	4	5	2	1	1	1	1	1.81603	4.98041	7.77778	49.6778	0.083333	8.97914	1.34615
435	4	17	1	3	1	3	1	3	1	5	4	4	4	3	5	4	3	1	1	1	1	1.75836	5.08941	9.11111	40.8711	0.068444	9.5719	1.4466
436	4	22	1	3.33333	1	3	1	1	1	5	1	4	1	3	4	3	1	1	1	1	1	1.78903	5.02574	8.55556	34.7467	0.058222	9.94511	1.01329
437	4	23	2	5.33333	0	3	1	3	1	3	5	2	1	7	4	2	4	1	1	1	1	1.7582	5.18091	7	54.5	0.091333	10.3842	1.31853
438	4	20	1	5.66667	0	3	1	6	1	2	4	2	3	2	1	3	2	1	1	1	1	1.70728	5.32303	9.11111	50.7667	0.085111	11.1306	1.39017
439	4	19	2	6.33333	1	3	1	3	1	2	6	2	1	5	1	3	3	1	1	1	1	1.70043	5.22429	7.88889	48.0044	0.080444	11.5258	1.13107
440	4	21	2	5.66667	0	3	1	1	1	5	1	2	3	1	1	3	3	1	1	1	1	1.6329	5.06473	8.77778	49.6089	0.083111	12.6015	1.32427
441	4	19	2	7.66667	1	3	1	3	1	2	2	2	3	2	1	2	3	1	1	1	1	1.73048	5.11102	8.44444	46.7089	0.078222	12.1625	0.872631

## Sheet: Description of Variables
Legend
Gender
1 = Male
2 = Female
EthnWhite
1 = White
2 = Non-White
clusterid
Indicates the cluster that participants stood in at a given timepoint. Participants with the same clusterid code stood in the same group at that time
SmallGroups
These two variables indicate mean group composition in terms of gender(SmallGroups_Gender) and attractiveness (SmallGroups_Attractiveness)
disttravm.16_meters
Indicates distance that participant traveled during social loafing task
speedms_16_meters
Indicates speed that participants traveled at during foraging task
nbordistem.1_meters
Indicates embeddedness during mingling task
point2cent.meters.smallgroups
Indicates centrality during small grouping
